# Supplementary material for: A wireless neural recording system with a precision motorized microdrive for freely behaving animals
Source: PubMed Central journal article supplement — Sci Rep. 2015 Jan 19;5:7853. doi: 10.1038/srep07853 (PMC4297970; doi:10.1038/srep07853), 2015-01-19
Supplement: srep07853-s1.pdf [file srep07853-s1.pdf]

**A wireless neural recording system with a precision motorized microdrive for freely behaving animals**

Taku Hasegawa, Hisataka Fujimoto, Koichiro Tashiro, Mayu Nonomura, Akira Tsuchiya,  
and Dai Watanabe

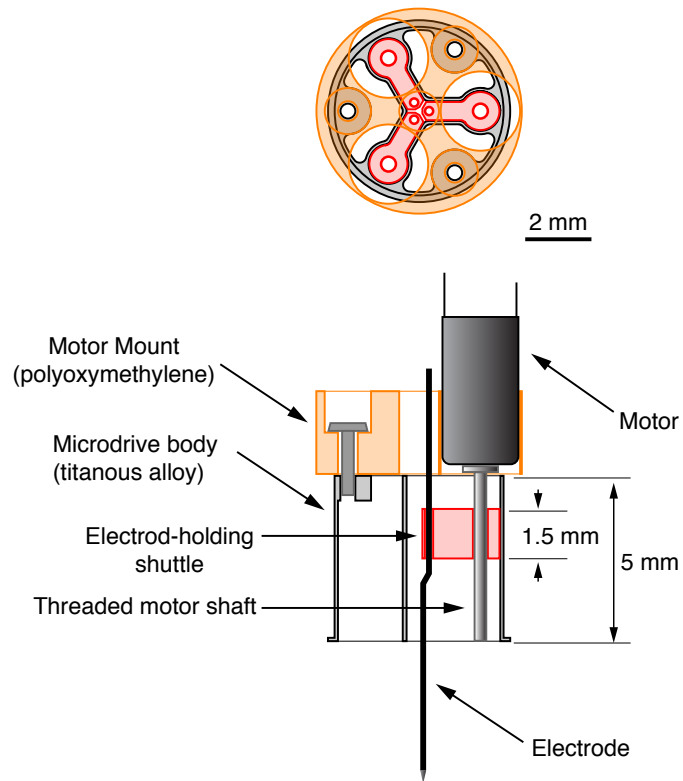

**Supplementary Figure S1 | Schematic drawing of a motorized microdrive.** Each electrode-holding shuttle (red) can travel along a threaded motor shaft (pitch 125  $\mu\text{m}$ ) in a “Y-shaped” space within a microdrive body. A motor mount is screwed onto the microdrive body.

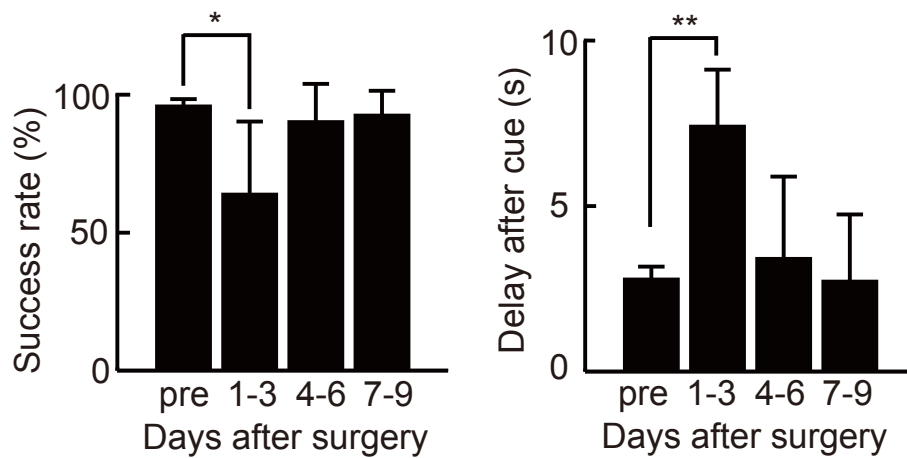

**Supplementary Figure S2 | Effect of the wireless recording system on the operant task performance.** Rats were water-deprived for 16-18 hr and placed in the operant chamber for a session consisting of 100 trials per day. In each session, rats were trained to press a lever after the presentation of a tone cue (1-kHz) to obtain a drop of sucrose-containing water as a reward. Rats learned to press the lever within 20 s after the cue presentation to be scored as “success”. When the success rate reached over 90% for more than 3 consecutive sessions (pre-surgery sessions), the microdrive and WIF were implanted. The success rates decreased and the responses to the cues were delayed for 3 days after surgery. However, the performance recovered to the pre-surgery level thereafter (n = 5; t-test with pre-surgery). \*P < 0.1, \*\*P < 0.05; error bars, s.d.

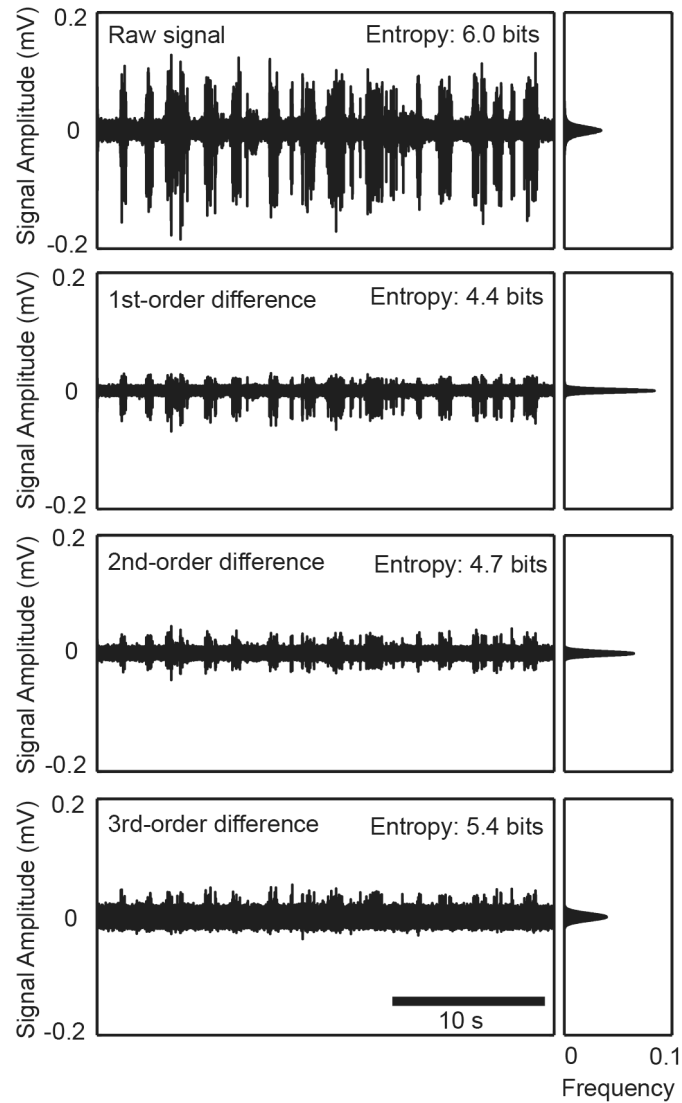

**Supplementary Figure S3 | Amplitude probability distributions of a sampled neuronal signal and its first-, second-, and third-order differences.** Activity of the cortical neuron was recorded in an anesthetized rat with a 20 kHz sampling rate and a 10-bit resolution. Top: sampled neuronal signal (left) and its amplitude probability distribution (right). Second to Fourth Row: the first-, second-, and third-order differences of the same sampled data, respectively. Note that the data size of the theoretical limits in lossless compression (entropy) was the smallest when taking the first-order difference, and the data size could theoretically be reduced to 44% of the original (4.4 bit / 10 bit).

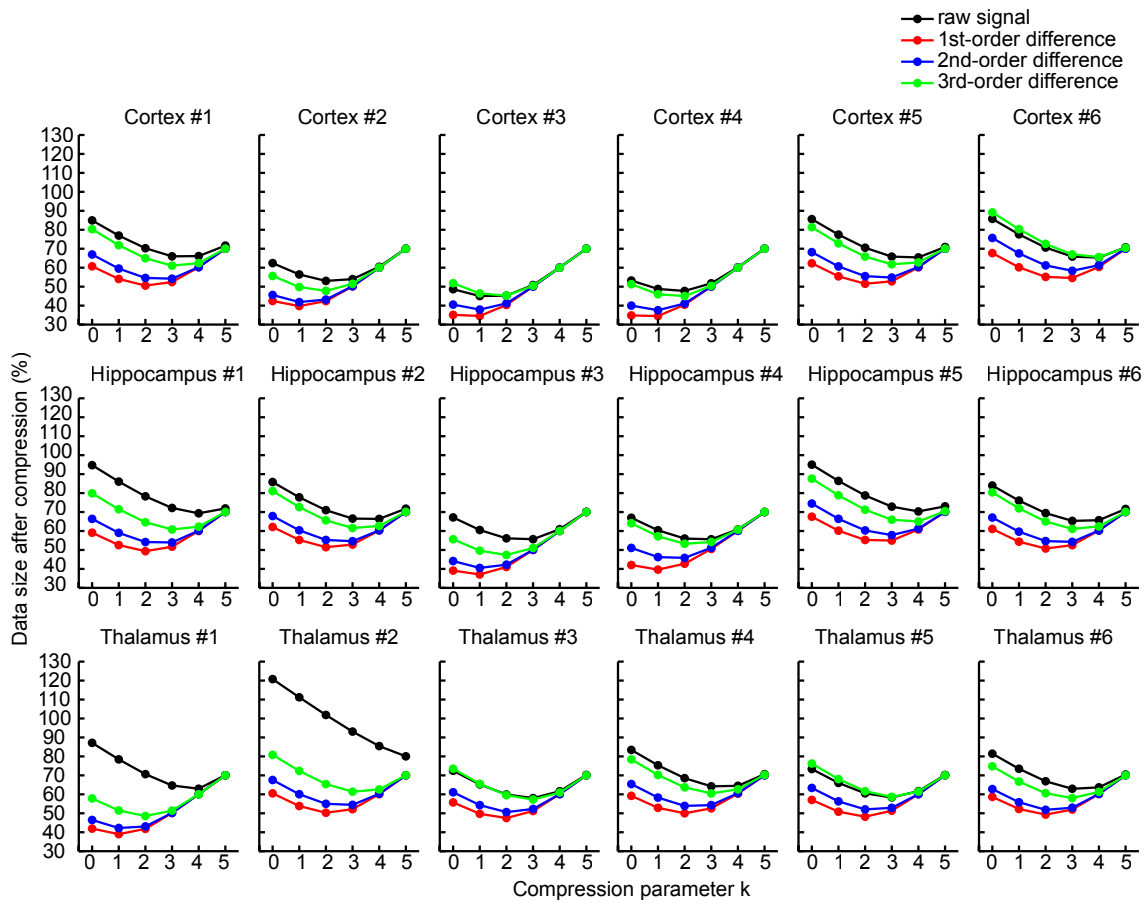

**Supplementary Figure S4 | The effects of the first-, second-, or third-order difference operation and parameter k on the compression efficiency of the variable-length encoding.** Neural recording data of the cortex, hippocampus, and thalamus in anesthetized rats (60 s, n = 6 neurons each ) were used. Notice that, for all of the recoded data, taking the first-order difference resulted in the smallest data size.

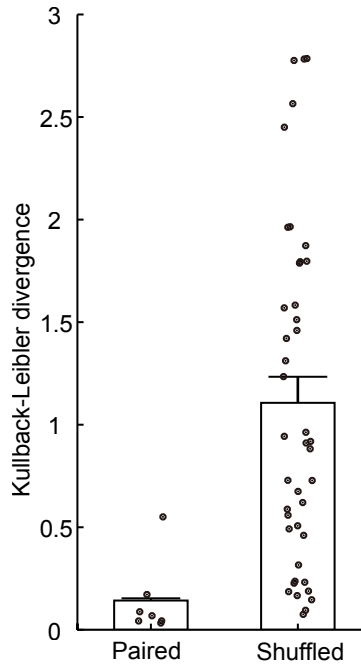

**Supplementary Figure S5 | Similarity in clustering pattern of detected spikes and background noise between wired and wireless recording systems.** To evaluate the patterns of spike clusters between wired and wireless systems, all peaks including background noise were extracted as shown in Figure 3.  $V_{PP}$  and  $W_H$  of all peaks were converted to z scores and their distributions were smoothed with a 2-dimensional Gaussian filter ( $\sigma = 0.3$ ). Kullback-Leibler (K-L) divergence of the peak distribution between the two systems were calculated using the simultaneously recorded data (“paired”) and using the data at different sessions (“shuffled”). The “paired” group showed a significantly smaller divergence ( $P = 0.0156$ ;  $n=7$ ; Wilcoxon signed rank test), indicating that the clustering patterns of detected spikes and background noise using the wireless recording system are similar to those simultaneously recorded using the wired system.

## **Supplementary Video**

**Supplementary Movie S1** | Activity of a single neuron was wirelessly recorded in the thalamic parafascicular nucleus (PF) of a freely behaving rat. The frequency (Hz) and traces indicate the firing rate and the action potentials detected per second, respectively.
